# Supplementary material for: Early Events in the Evolution of Spider Silk Genes
Source: PubMed Central journal article supplement (PMC3382249; doi:10.1371/journal.pone.0038084), 2012-06-22
Supplement: pone.0038084.s003.pdf [file pone.0038084.s003.pdf]

## Supplementary Table

Table S2. **Continuous character data and alternative reconciliation based outgroups for ML constrained tree.** Ancestral state parsimony optimization was determined by Mesquite v. 2.74 [80]. Node numbers refer to the phylogeny in Figures 3, 5, and S1.

| Node#                             | Alanine %   | Glycine %  | Serine %    | Alternative Rooting/<br>Outgroup                       |
|-----------------------------------|-------------|------------|-------------|--------------------------------------------------------|
|                                   |             |            |             | duplications/<br>losses/ deep<br>coalescence<br>events |
| 1                                 | 26.5-36.44  | 3.15-12.83 | 17.18-19.03 |                                                        |
| 2 ( <i>Liphistius_fib1</i> )      | 26.5        | 3.15       | 19.03       | 31/69/81                                               |
| 3                                 | 26.5-36.44  | 9.69-12.83 | 17.18-18.94 |                                                        |
| 4 ( <i>Hypochilus_fib1</i> )      | 40.28       | 23.7       | 9.72        | 31/70/82                                               |
| 5                                 | 26.5-36.44  | 9.69-12.83 | 17.18-18.94 | 31/70/82                                               |
| 6                                 | 26.5-36.44  | 9.69-12.83 | 17.18-18.94 | 31/71/83                                               |
| 7                                 | 26.5-36.44  | 7.13       | 18.94       |                                                        |
| 8 ( <i>Aphonopelma_fib1</i> )     | 8.15        | 7.13       | 18.94       |                                                        |
| 9 ( <i>Sphodros_fib1</i> )        | 39.07       | 4.52       | 24.78       |                                                        |
| 10                                | 29.1-36.44  | 13.15-19.0 | 12.64-18.94 |                                                        |
| 11                                | 29.1-36.44  | 13.15-19.0 | 12.64-18.94 |                                                        |
| 12 ( <i>Plectreurys_fib2</i> )    | 29.1        | 13.15      | 20.09       |                                                        |
| 13 ( <i>Plectreurys_fib1</i> )    | 41.19       | 27.1       | 12.64       |                                                        |
| 14                                | 36.44       | 19         | 11.74       |                                                        |
| 15 ( <i>Diguertia_MaSplike</i> )  | 36.44       | 30.97      | 11.74       |                                                        |
| 16 ( <i>Diguertia_MaSplike2</i> ) | 54.75       | 19         | 9.95        |                                                        |
| 17                                | 25.26-29.65 | 9.69-12.83 | 17.18-18.94 | 31/71/83                                               |
| 18                                | 25.26-29.65 | 9.69-12.83 | 20.53-21.46 | 31/72/84                                               |
| 19                                | 25.26-29.65 | 9.69-12.83 | 20.53-21.46 | 31/74/86                                               |
| 20 ( <i>Hypochilus_fib2</i> )     | 33.68       | 13.51      | 20.53       |                                                        |
| 21                                | 14.67       | 9.69-12.83 | 20.53-21.46 |                                                        |
| 22 ( <i>Uloborus_AcSp1</i> )      | 14.67       | 7.29       | 26.63       |                                                        |
| 23                                | 14.15       | 12.83      | 20.53-21.46 |                                                        |
| 24 ( <i>Latrodectus_AcSp1</i> )   | 13.43       | 12.83      | 13.63       |                                                        |
| 25 ( <i>Argiope_AcSp1</i> )       | 14.15       | 15.5       | 21.46       |                                                        |
| 26                                | 25.26-29.65 | 9.69       | 22.11-29.91 | 31/74/86                                               |
| 27 ( <i>Plectreurys_fib3</i> )    | 25.26       | 2.14       | 30.94       |                                                        |
| 28                                | 29.21-29.65 | 9.69       | 22.11-29.91 |                                                        |
| 29 ( <i>Uloborus_TuSp1</i> )      | 29.65       | 9.69       | 29.91       |                                                        |
| 30                                | 29.21-29.65 | 9.69       | 22.11-26.86 |                                                        |

|                                 |             |             |             |          |
|---------------------------------|-------------|-------------|-------------|----------|
| 31 ( <i>Deinopis</i> TuSp1)     | 34.5        | 11.78       | 20.34       |          |
| 32                              | 29.21       | 8.52        | 22.11-26.86 |          |
| 33 ( <i>Latrodectus</i> TuSp1)  | 26.01       | 6.75        | 26.86       |          |
| 34 ( <i>Nephila</i> TuSp1)      | 29.21       | 8.52        | 22.11       |          |
| 35                              | 24.23-27.59 | 9.69-12.83  | 17.18-18.94 | 31/72/84 |
| 36                              | 22.44-27.59 | 8.25-12.83  | 17.18-18.94 | 31/73/85 |
| 37                              | 22.44-27.59 | 8.25-12.83  | 17.18-18.94 |          |
| 38 ( <i>Plectreurys</i> fib4)   | 22.44       | 13.85       | 17.18       |          |
| 39                              | 22.44-27.59 | 1.97-5.41   | 17.18-18.94 |          |
| 40 ( <i>Latrodectus</i> PySp1)  | 45.15       | 0           | 7.26        |          |
| 41                              | 17.69       | 1.97-5.41   | 26.6        |          |
| 42 ( <i>Argiope</i> PySp1)      | 17.69       | 5.41        | 27.76       |          |
| 43 ( <i>Nephila</i> PySp1)      | 13.79       | 1.97        | 26.6        |          |
| 44                              | 22.44-27.59 | 8.25-12.83  | 17.18-21.38 |          |
| 45                              | 23.9-28.39  | 8.25-12.83  | 17.18-21.38 |          |
| 46 ( <i>Antrodiaetus</i> fib1)  | 28.39       | 29.66       | 2.97        |          |
| 47                              | 23.9-28.39  | 6.23-10.53  | 22.09-23.07 |          |
| 48 ( <i>Antrodiaetus</i> fib2)  | 23.9        | 4.92        | 31.45       |          |
| 49                              | 35.17       | 6.23-10.53  | 22.09-23.07 |          |
| 50 ( <i>Megahexura</i> fib1)    | 38.07       | 10.53       | 22.09       |          |
| 51                              | ?           | ?           | ?           |          |
| 52 ( <i>Aliatypus</i> fib1)     | 35.17       | 6.23        | 23.07       |          |
| 53 ( <i>Hexura</i> fib1)        | ?           | ?           | ?           |          |
| 54                              | 20.7-27.59  | 8.25-8.9    | 19.37-21.38 |          |
| 55 ( <i>Poecilotheria</i> fib1) | 20.7        | 6.46        | 23.57       |          |
| 56                              | 20.7-27.59  | 8.25-8.9    | 19.37-21.38 |          |
| 57 ( <i>Aphonopelma</i> fib2)   | 17.8        | 8.9         | 19.37       |          |
| 58                              | 20.7-33.23  | 8.25-8.9    | 21.38       |          |
| 59                              | 26.03-33.23 | 8.25-8.9    | 21.38       |          |
| 60 ( <i>Poecilotheria</i> fib2) | 33.23       | 10.15       | 21.38       |          |
| 61                              | 26.03-33.23 | 8.25        | 21.38       |          |
| 62 ( <i>Aphonopelma</i> fib3)   | 26.03       | 8.25        | 20.32       |          |
| 63                              | 30.65-34.51 | 8.24-8.25   | 21.74-24.9  |          |
| 64 ( <i>Avicularia</i> fib1a)   | 34.51       | 8.24        | 24.9        |          |
| 65                              | 30.65-34.51 | 8.24-8.25   | 21.74-24.9  |          |
| 66 ( <i>Avicularia</i> fib1b)   | 30.65       | 9.57        | 21.74       |          |
| 67 ( <i>Avicularia</i> fib1c)   | 36.95       | 5.99        | 25.2        |          |
| 68                              | 20.7-33.23  | 6.98-8.9    | 22.58-22.81 |          |
| 69                              | 20.7-33.23  | 6.98-8.9    | 22.81       |          |
| 70 ( <i>Euagrus</i> fib1)       | 38.57       | 11.75       | 24.92       |          |
| 71 ( <i>Aptostichus</i> fib1)   | 18.02       | 6.98        | 22.81       |          |
| 72                              | 20.7-33.23  | 6.07-6.19   | 22.58-22.81 |          |
| 73 ( <i>Aptostichus</i> fib2)   | 19.97       | 6.07        | 23          |          |
| 74                              | 30.43-38.25 | 6.07-6.19   | 22.58-22.81 |          |
| 75 ( <i>Bothriocyrtum</i> fib3) | 38.25       | 6.19        | 21.04       |          |
| 76                              | 30.43-38.25 | 4.66        | 22.58-22.81 |          |
| 77 ( <i>Bothriocyrtum</i> fib2) | 38.28       | 4.66        | 22.58       |          |
| 78 ( <i>Bothriocyrtum</i> fib1) | 30.43       | 3.52        | 23.4        |          |
| 79                              | 24.23-27.59 | 40.22-40.91 | 6.9-18.94   | 31/73/85 |
| 80                              | 24.23-27.59 | 40.91       | 6.9-18.94   | 31/77/89 |
| 81 ( <i>Deinopis</i> fib2)      | 16.48       | 40.91       | 19.13       | 31/84/96 |

|                                |             |             |           |           |
|--------------------------------|-------------|-------------|-----------|-----------|
| 82                             | 27.59       | 46.06       | 6.9       | 31/84/96  |
| 83 ( <i>Deinopis</i> fib1b)    | 27.59       | 46.06       | 6.9       | 31/91/103 |
| 84 ( <i>Deinopis</i> fib1a)    | 31.14       | 48.23       | 4.86      | 31/91/103 |
| 85                             | 24.23-27.59 | 40.22-40.91 | 6.7-6.73  | 31/77/89  |
| 86                             | 24.23-27.59 | 40.22-40.91 | 6.7-6.73  | 31/81/93  |
| 87                             | 24.23-32.25 | 40.22-40.91 | 6.12-6.73 | 31/85/97  |
| 88 ( <i>Nephila</i> MaSp1)     | 33.1        | 44.13       | 3.56      | 31/92/104 |
| 89                             | 24.23-32.25 | 35.83-40.91 | 6.12-6.73 | 31/92/104 |
| 90 ( <i>Nephila</i> MaSp2)     | 22.26       | 35.09       | 7.55      |           |
| 91                             | 32.25       | 35.83-40.91 | 6.12      |           |
| 92 ( <i>Latrodectus</i> MaSp2) | 32.25       | 35.83       | 6.12      |           |
| 93 ( <i>Latrodectus</i> MaSp1) | 34.85       | 44.47       | 1.86      |           |
| 94                             | 24.23-26.5  | 40.22-40.91 | 6.7-6.73  | 31/85/97  |
| 95                             | 24.23-26.5  | 43.55-43.6  | 6.7-6.73  |           |
| 96 ( <i>Peucetia</i> MaSp1)    | 24.23       | 44.9        | 8.42      |           |
| 97                             | 24.23-26.5  | 43.55-43.6  | 6.7-6.73  |           |
| 98 ( <i>Dolomedes</i> fib1)    | 23.12       | 43.55       | 6.51      |           |
| 99 ( <i>Dolomedes</i> fib2)    | 28.96       | 43.6        | 6.73      |           |
| 100                            | 24.23-26.5  | 36.22-40.91 | 6.7-6.73  |           |
| 101                            | 23.61       | 36.22       | 4.46      |           |
| 102 ( <i>Deinopis</i> MaSp2a)  | 19.41       | 36.22       | 4.45      |           |
| 103 ( <i>Deinopis</i> MaSp2b)  | 23.61       | 32.97       | 4.46      |           |
| 104                            | 26.5        | 36.22-40.91 | 6.84      |           |
| 105 ( <i>Uloborus</i> MaSp1)   | 26.92       | 44.23       | 8.65      |           |
| 106 ( <i>Uloborus</i> MaSp2)   | 26.5        | 30.77       | 6.84      |           |
| 107                            | 24.23-27.59 | 40.22-40.91 | 6.7-6.73  | 31/81/93  |
| 108                            | 24.23-35.47 | 40.22       | 6.7-6.73  | 31/86/98  |
| 109 ( <i>Nephila</i> MiSp1)    | 36.52       | 40.22       | 4.83      |           |
| 110                            | 24.23-35.47 | 34.16       | 10.73     |           |
| 111 ( <i>Deinopis</i> MiSp1)   | 22.83       | 24.07       | 13.4      |           |
| 112 ( <i>Uloborus</i> MiSp)    | 35.47       | 34.16       | 10.73     |           |
| 113                            | 5.49-12.01  | 45.58       | 6.7-6.73  | 31/86/98  |
| 114 ( <i>Deinopis</i> Flag)    | 3.49        | 45.58       | 6.7       |           |
| 115                            | 5.49-12.01  | 53          | 6.7-6.73  |           |
| 116 ( <i>Nephila</i> Flag)     | 5.49        | 55.24       | 8.05      |           |
| 117 ( <i>Argiope</i> Flag)     | 12.01       | 53          | 5.3       |           |
